**Fig. S1. Changes in signalling in response to AZD8055 and Rapamycin.**

**(A) AZD8055 fully inhibits mTOR signalling in resistant (CO115) and sensitive (COLO205) cell lines.** CO115 and COLO205 cells were treated with increasing doses of AZD8055 for 24 hours. Whole cell lysates were fractionated by SDS-PAGE and immunoblotted with the indicated antibodies

**(B) AZD8055 and Rapamycin causes strong dephosphorylation of 4EBP1 in SW620 cells.** SW620 cells were treated for 1, 2 or 4 hours with 1 $\mu$ M AZD8055 or 1 $\mu$ M Rapamycin. Whole cell lysates were fractionated by SDS-PAGE and immunoblotted with the indicated antibodies.

In each case results are taken from a single experiment; identical results were obtained in n=3 experiments.

**Fig. S2. Validation of pRL-IRES-FL as a reporter for cap-dependent translation.**

**(A-C)** SW620 cells were transfected with a dual renilla/firefly luciferase construct, pRL-IRES-FL, together with either an empty vector control (EV), HA-eIF4E (eIF4E) or 4EBP1 R13A/F113A-Myc/His (4EBP1<sup>AA</sup>). Lysates were prepared 24hr later and either used in a dual luciferase assay (**A & B**) or subjected to SDS-PAGE and immunoblotted with the indicated antibodies (**C**). In (**A**) both the separate cap-dependent Renilla and IRES-dependent Firefly values are shown whilst in (**B**) the cap/IRES ratio is shown.

**(D)** Parental SW620 or SW620:8055R cells were left untreated or treated with 2 $\mu$ M AZD8055 for 24 hours. Samples were prepared and the abundance of the firefly and renilla mRNAs was assessed by (q)PCR and normalized to YWHA, a stable mRNA control (left panels). In parallel, cells treated identically were assayed for firefly and renilla using the dual luciferase assay. Results are taken from a single experiment; identical results were obtained in n=3 experiments

**Fig. S3. AZD8055-resistant SW620 cells are cross-resistant to other mTOR kinase inhibitors but not to cytotoxic chemotherapy drugs.**

SW620 and SW620:8055R cells were treated with increasing concentrations of (A) PP242, (B) WYE-125132, (C) Doxorubicin, (D) Paclitaxel or (E) Etoposide for 24 hours and cell proliferation was assayed by [<sup>3</sup>H]thymidine incorporation. Results are the mean $\pm$ CoV for three biological replicates from a single experiment; identical results were obtained in n=3 experiments.

**Fig. S4. Response of AZD8055-resistant SW620 cells to a mixed PI3K/mTOR inhibitor (PI-103), a selective PI3K inhibitor (ZSTK474) or Rapamycin.**

SW620 and SW620:8055R cells were treated with increasing concentrations of (A) PI103, (B) ZSTK474 or (C) Rapamycin for 24 hours and cell proliferation was assayed by [<sup>3</sup>H]thymidine incorporation. Results are the mean±CoV for three biological replicates from a single experiment; identical results were obtained in n=3 experiments.

**Fig. S5. AZD8055-dependent loss of cyclin D1 (CCND1) is rescued by eIF4E expression.**

HEK293 TR cells, HEK293 TO-eIF4E cells or HEK293 TO-4EBP1<sup>AA</sup> cells were treated over time course of 6 days with tetracycline to induce the expression of eIF4E (TO-eIF4E) or 4EBP1 R13A/F113A (TO-4EBP1<sup>AA</sup>). Cells were then either treated with DMSO or AZD8055 for the final 24hrs and cell lysates were prepared, fractionated by SDS-PAGE and immunoblotted for the indicated antibodies (CCND1 = cyclin D1).

**A**

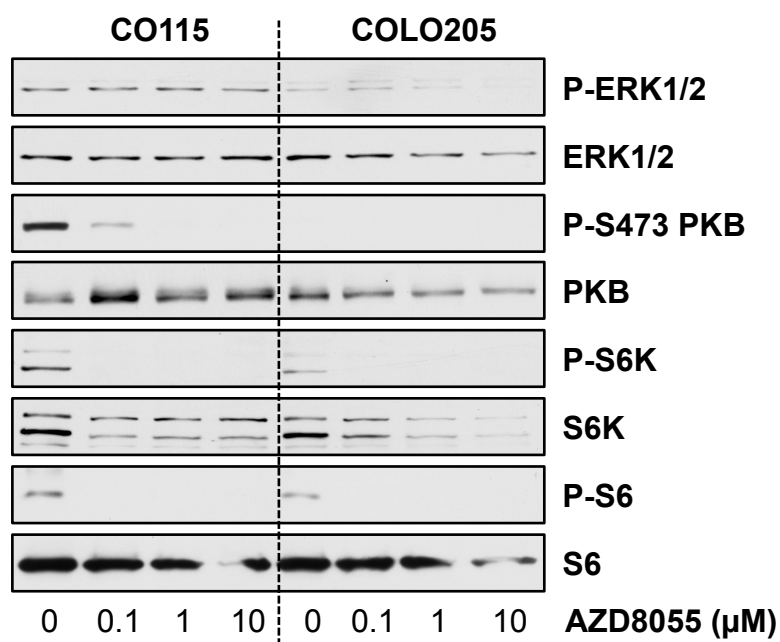

**B**

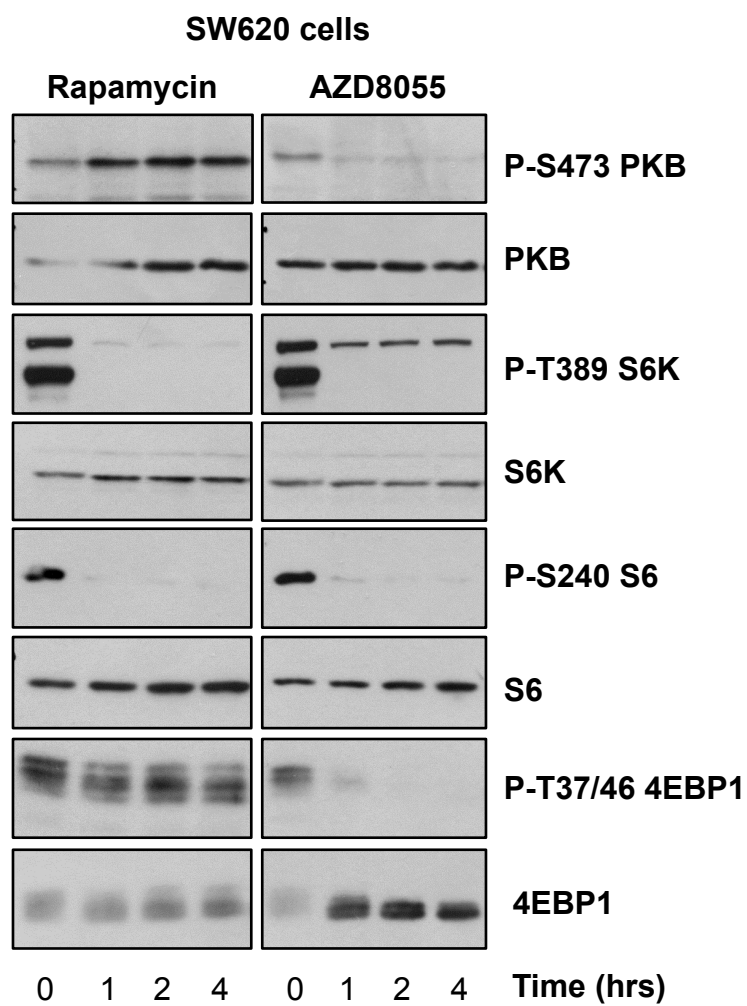

Supp Figure 2

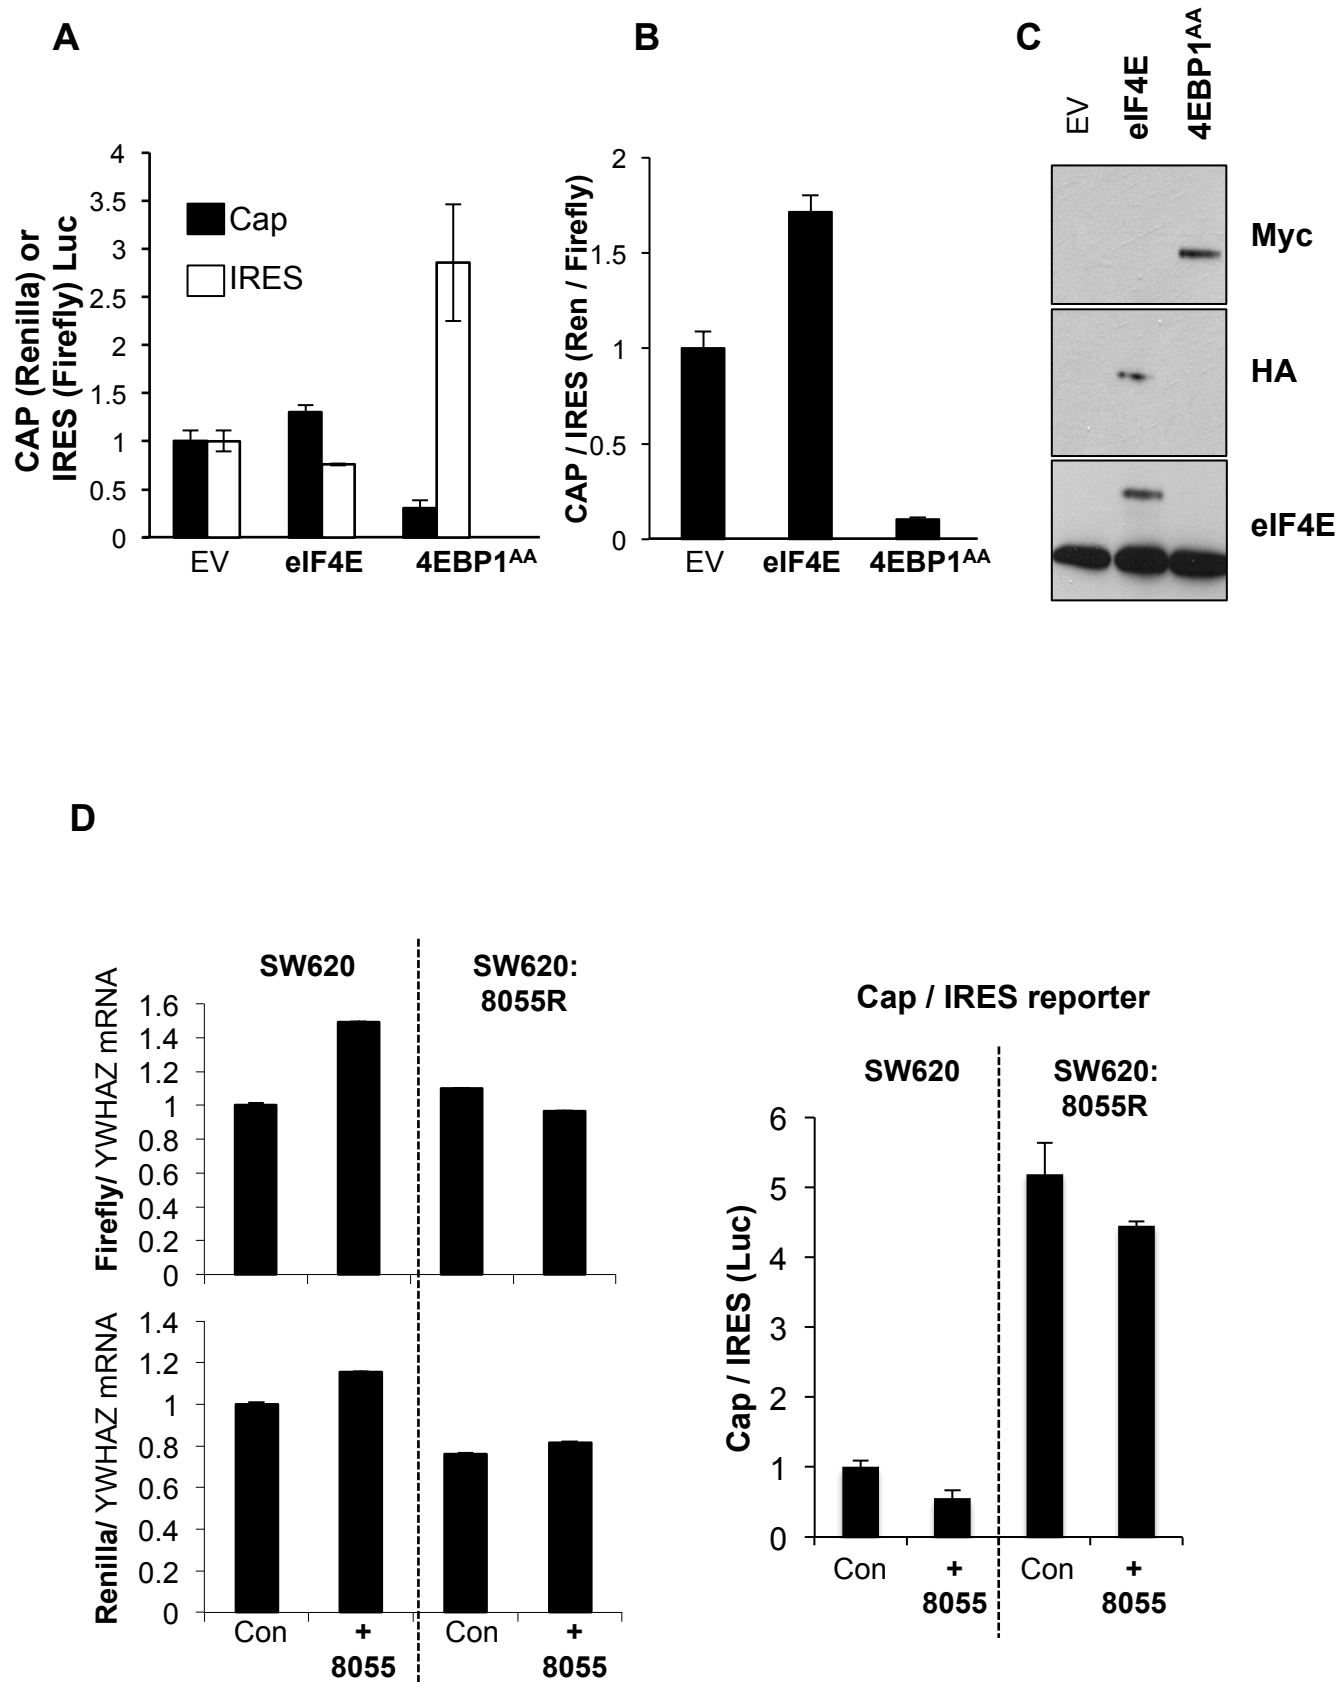

Supp Figure 3

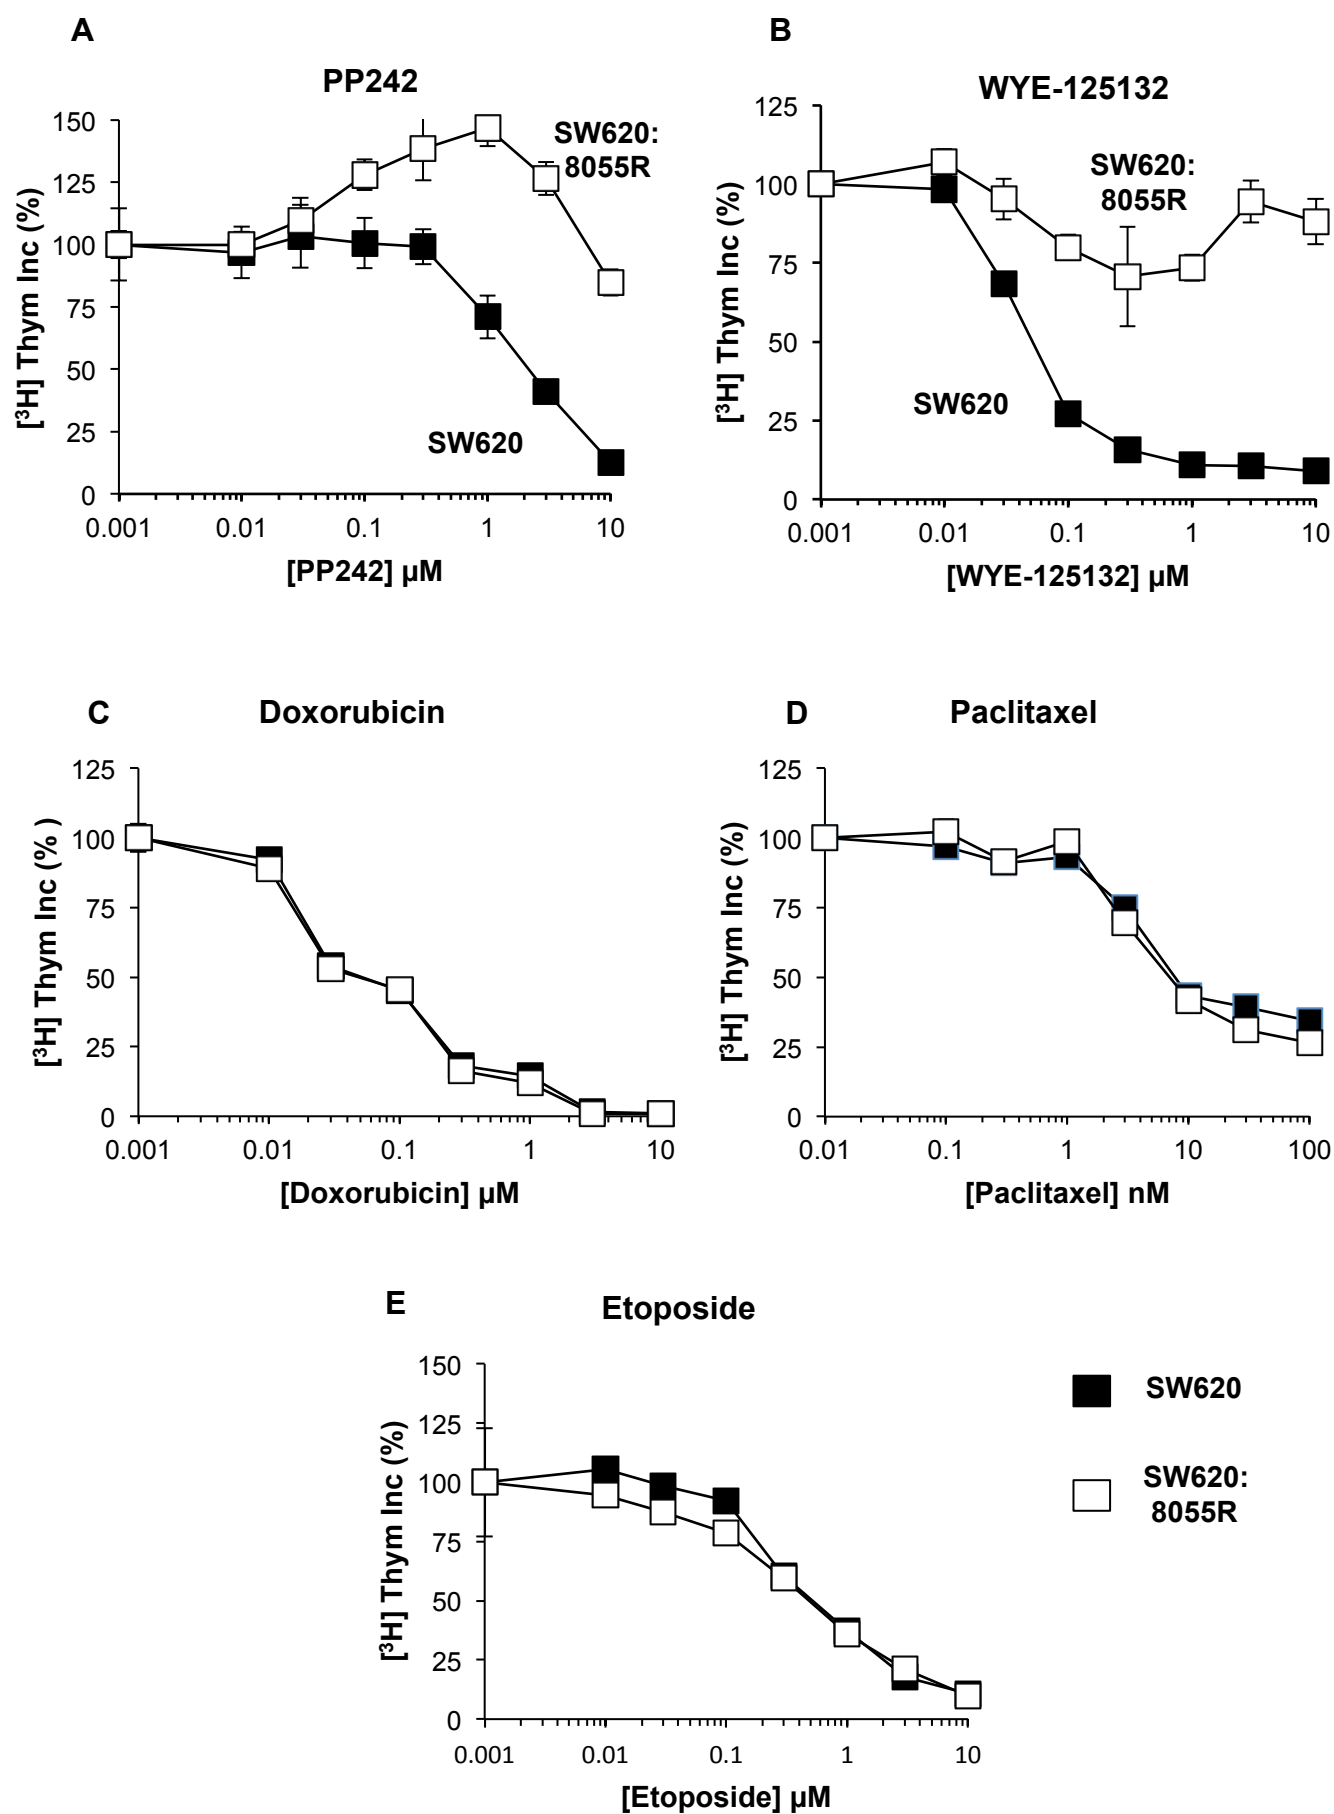

Supp Figure 4

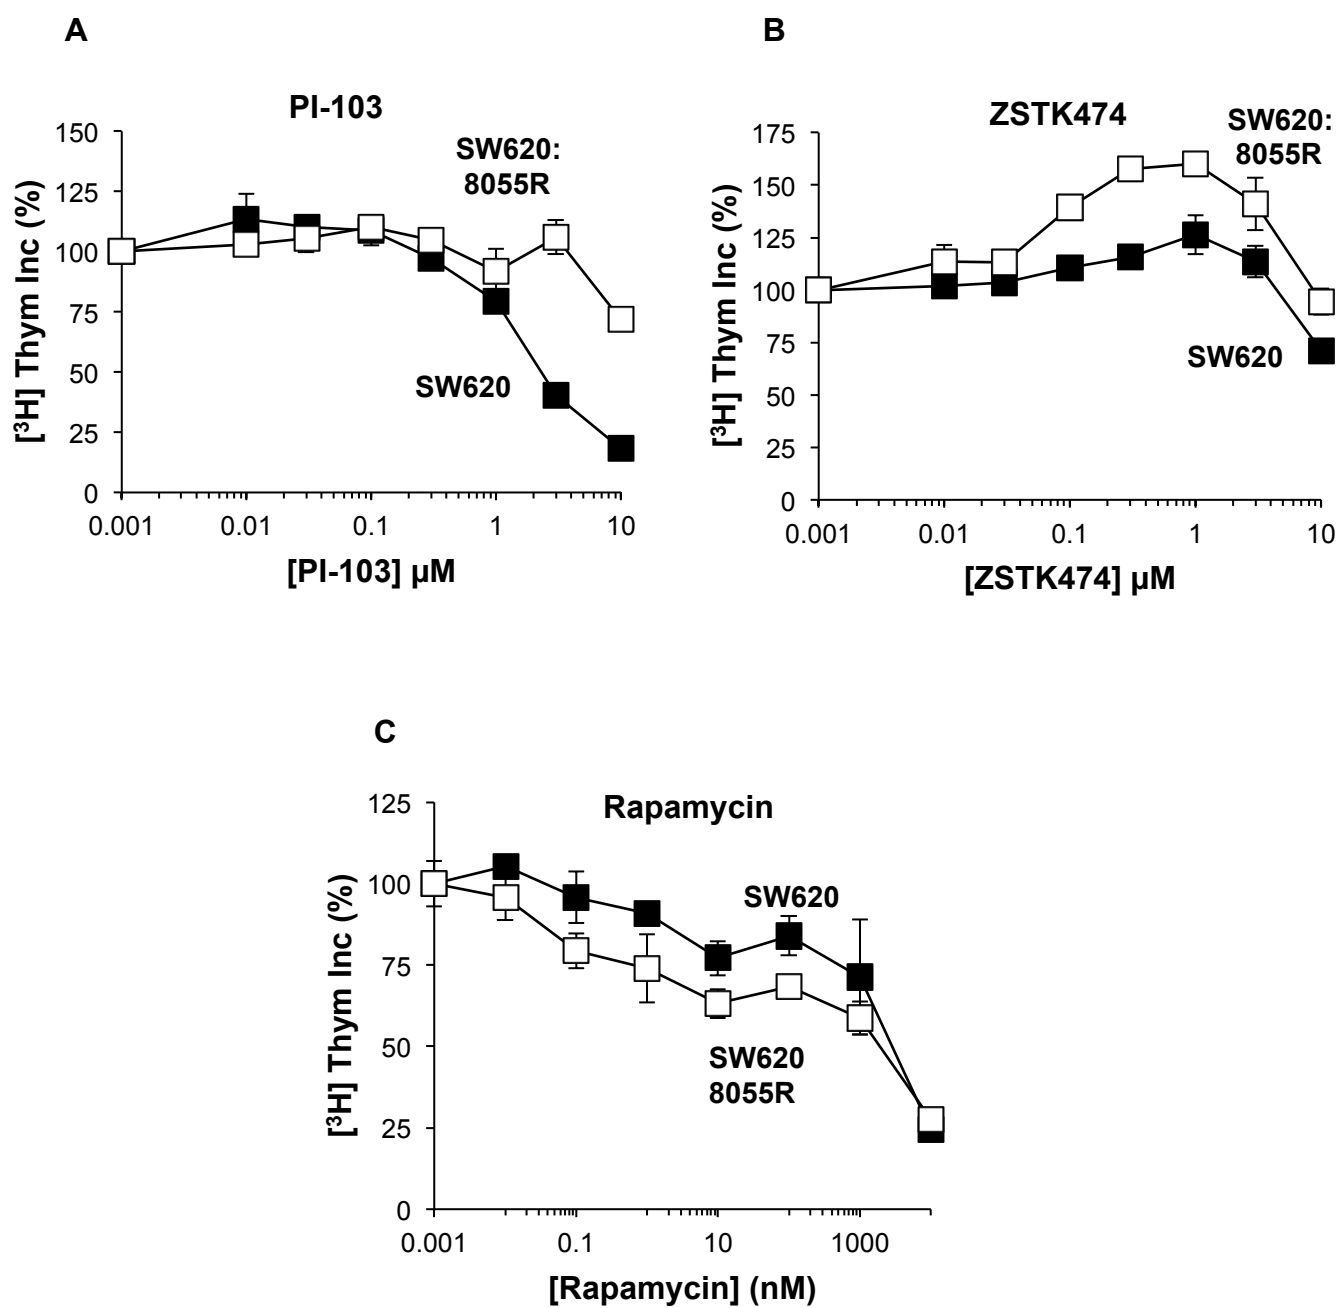

**Supp Figure 5**

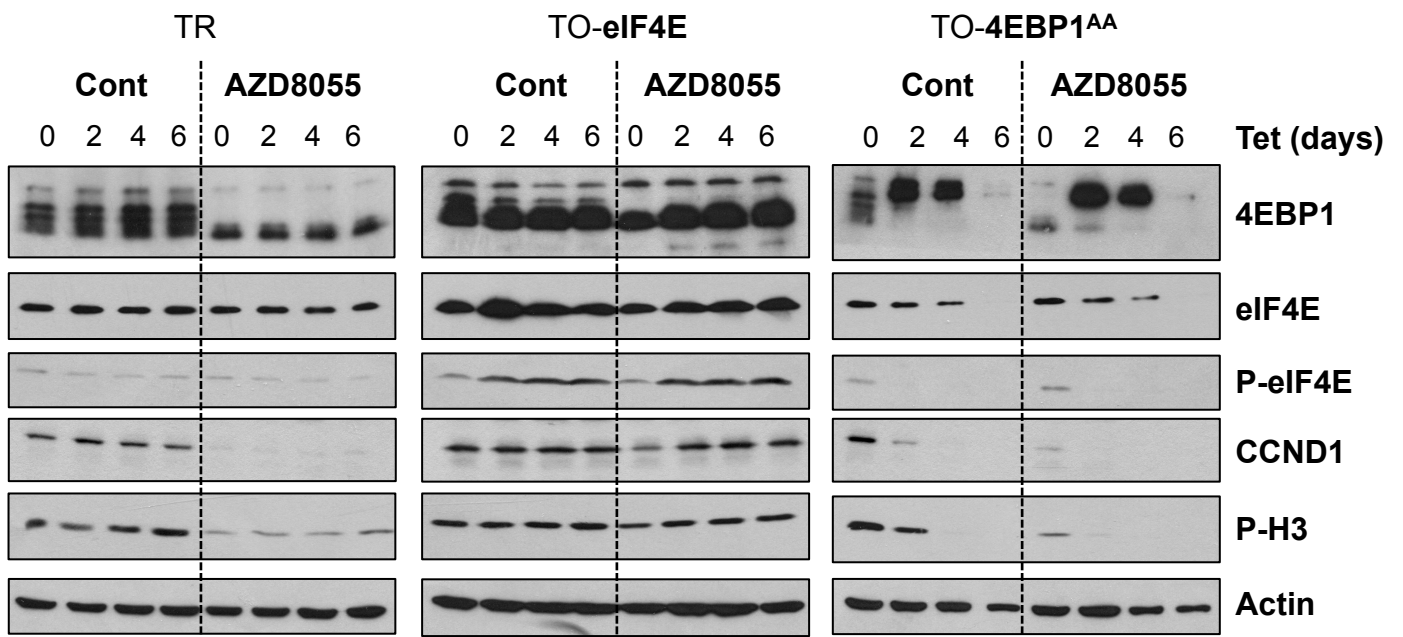

Source: https://cob.silverchair-cdn.com/cob/content_public/journal/jcs/127/4/10.1242_jcs.137588/4/jcs137588.pdf
